# Supplementary material for: Caveolar communication with xenobiotic-stalled ribosomes compromises gut barrier integrity
Source: PubMed Central journal article supplement (PMC7253476; doi:10.1038/s42003-020-0994-1), 2020-05-27
Supplement: 42003_2020_994_MOESM1_ESM.pdf [file 42003_2020_994_MOESM1_ESM.pdf]

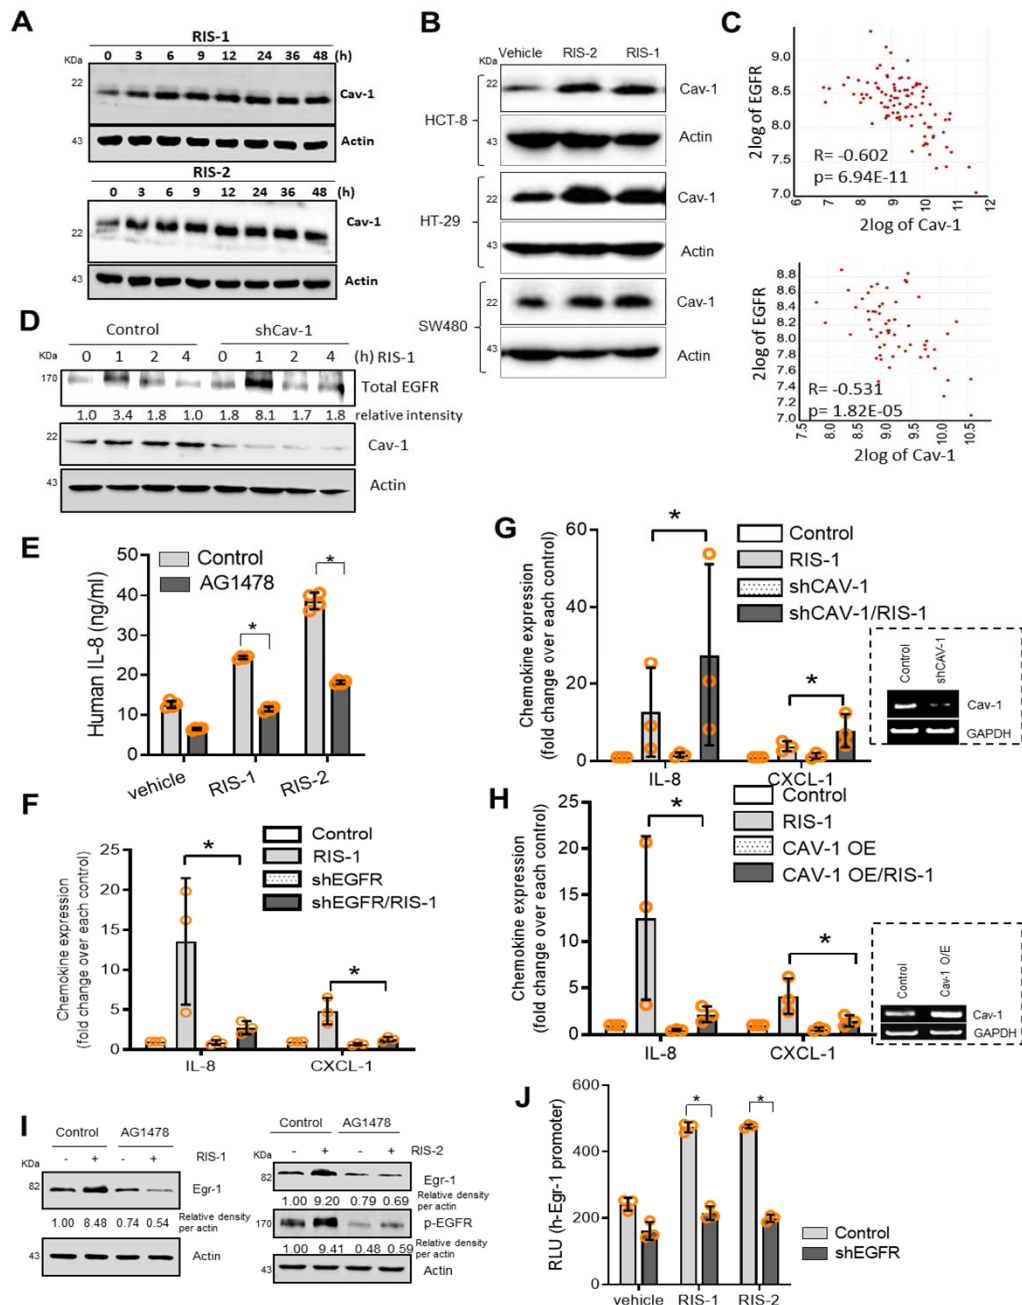

**Supplementary Figure 1.** (A) HCT-8 cells were treated with vehicle, 50 ng/mL RIS-1, or 500 ng/mL RIS-2 for the indicated time. Cell lysates were subjected to western blot analysis. (B) Different intestinal cells were treated with vehicle, 50 ng/mL RIS-1, or 500 ng/mL RIS-2 for 48 h. Cell lysates were subjected to western blot analysis. (C) Cav-1 and EGFR expression was compared in patients with IBD based on gene expression arrays (gse75214 [n=95, upper] and gse10616 [n=59, lower]). For two gene correlation coefficient (R) determination, *Pearson's* correlation analysis was performed. (D) HCT-8 cells transfected with control or shCav-1 vector were treated with vehicle or 50 ng/mL RIS-1 for the indicated time. Cell lysates were subjected to western blot analysis. (E) HCT-8 cells were pre-exposed to control or 10  $\mu$ M AG1478 for 2 h and treated with vehicle, 50 ng/mL RIS-1, or 500 ng/mL RIS-2 for 12 h. The IL-8 concentration secreted into the culture media was measured by ELISA. (F) HCT-8 cells transfected with control or shEGFR were treated with vehicle or 50 ng/mL RIS-1 for 1 h. IL-8 and CXCL-1 mRNA was measured using real-time RT-PCR. (G) HCT-8 cells transfected with control or shCAV-1 were treated with vehicle or 50 ng/mL RIS-1 for 1 h. IL-8 and CXCL-1 mRNA was measured using real-time RT-PCR. Boxes represent relative Cav-1 mRNA levels in HCT-8 cells transfected with control or shCav-1 vector. (H) HCT-8 cells transfected with control or Cav-1 overexpression vector were treated with vehicle or 50 ng/mL RIS-1 for 1 h. IL-8 and CXCL-1 mRNA was measured using real-time RT-PCR. Boxes represent relative Cav-1 mRNA levels in HCT-8 cells transfected with control or Cav-1 overexpression vector. (I) HCT-8 cells were pre-exposed to control or 10  $\mu$ M AG1478 for 2 h and treated with vehicle, 500 ng/mL RIS-2, or 50 ng/mL RIS-1 for 1 h. Cell lysates were subjected to western blot analysis. (J) Control or shEGFR-expressing HCT-8 cells were transfected with human Egr-1 promoter (-1.26kb)-linked reporter plasmid and treated with vehicle, 50 ng/mL RIS-1, or 500 ng/mL RIS-2 for 9 h. (E- J) Groups with an asterisk are significantly different ( $p < 0.05$ ). Results are representative of three independent experiments.

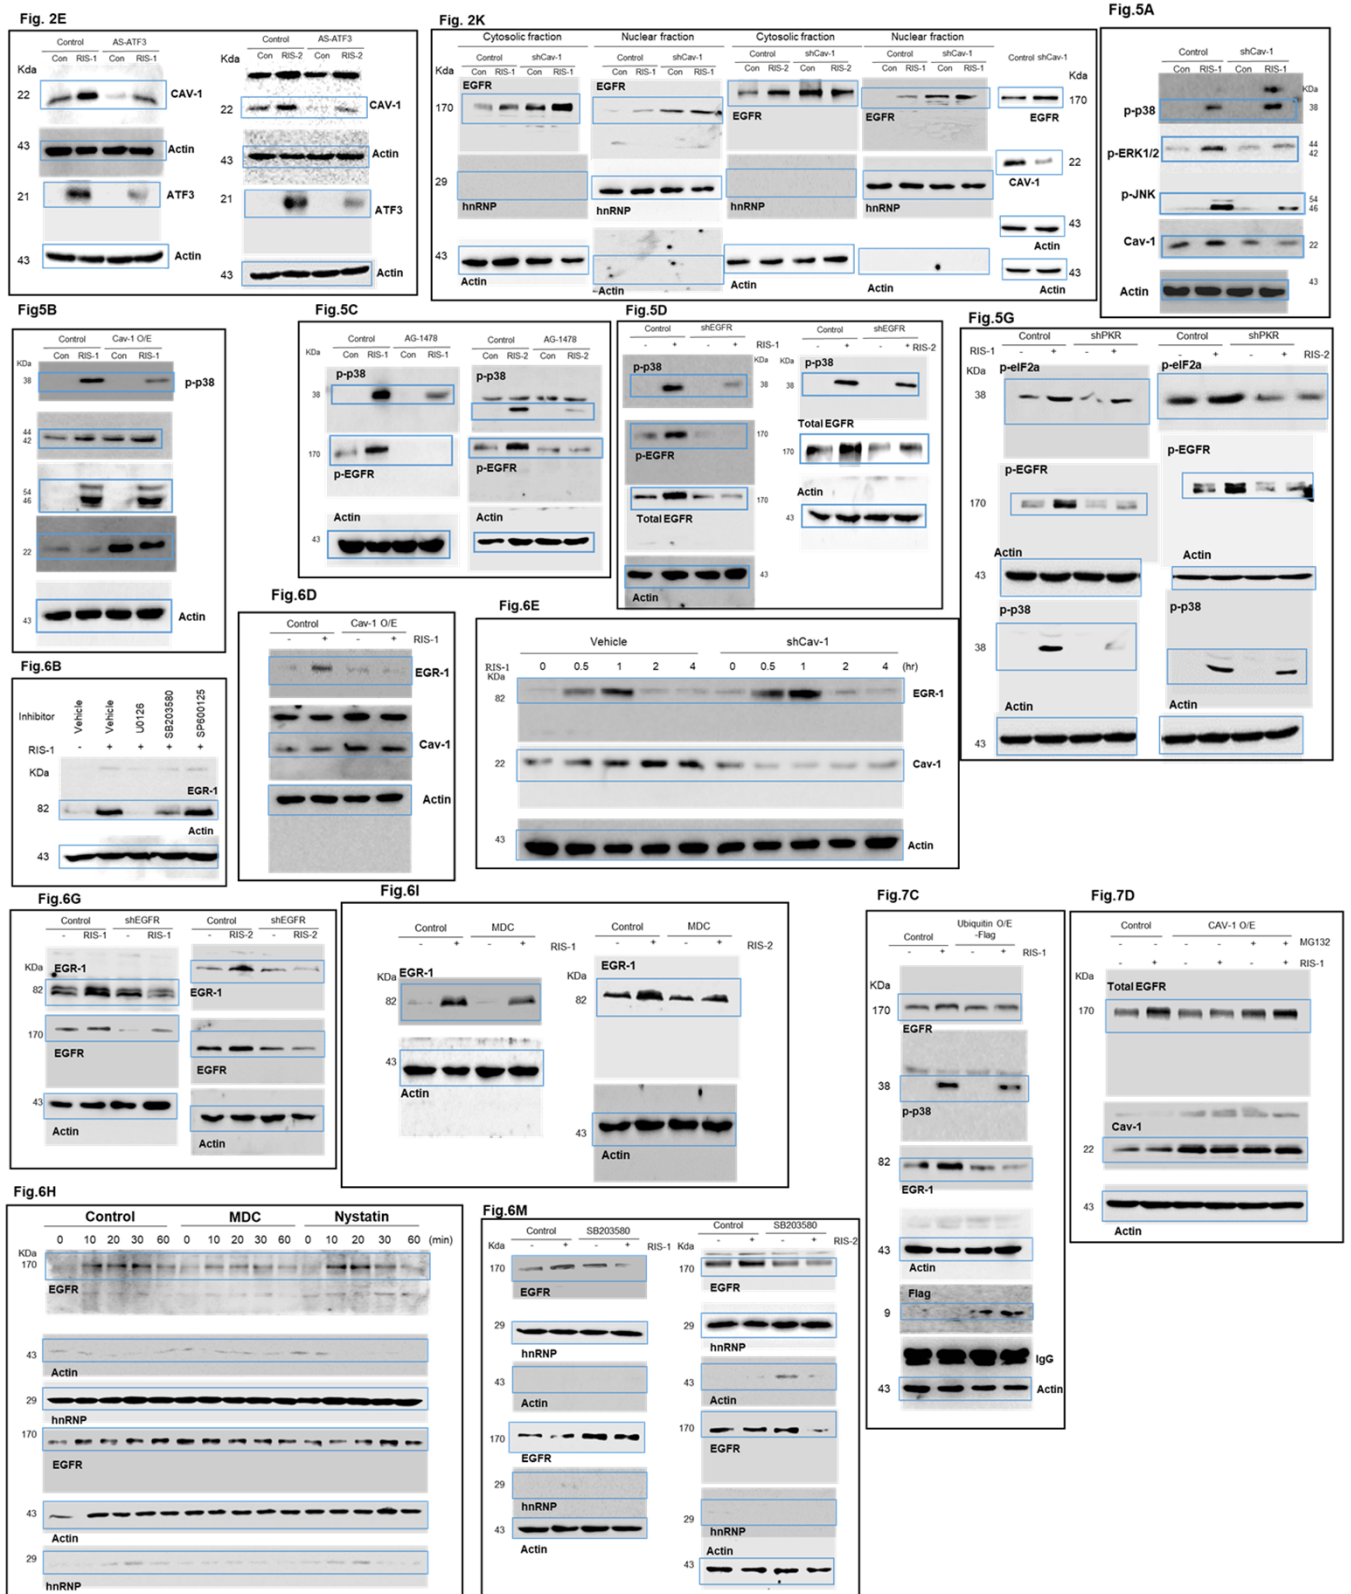

Supplementary Figure 2. Original immunoblots for panels shown in Figures 2, 5, 6, and 7.

**Supplementary Table 1.** Primers used for PCR

| Target genes      | sense                                                                       | Anti-sense                                |
|-------------------|-----------------------------------------------------------------------------|-------------------------------------------|
| Human IL-8        | 5'-ATG ACT TCC AAG CTG<br>GCC GTG GCT-3'                                    | 5'-TCT CAG CCC TCT TCAAAA<br>ACT TCT C-3' |
| human CXCL-1      | 5'-CTG CTC CTG CTC CTG<br>GTA G-3'                                          | 5'-TGG ATT TGT CAC TGT TCA<br>GCA-3'      |
| human MCP-1       | 5'-TCT GTG CCT GCT GCT<br>CAT AG-3'                                         | 5'-TGG AAT CCT GAA CCC<br>ACT TC-3'       |
| human Cav-1       | 5'-TCT CTA CAC CGT TCC CAT<br>CC-3'                                         | 5'-CGA AGT AAA TGC CCC<br>AGA TG-3'       |
| human alpha Cav-1 | 5'-GTC TGG GGG CAA ATA<br>CGT AG-3'                                         | 5'- AAG AGG GCA GAC AGC<br>AAG CG -3'     |
| human beta Cav-1  | 5'-ATG GCA GAC GAG CTG<br>AGC GA-3'                                         | 5'-AAG AGG GCA GAC AGC<br>AAG CG-3'       |
| human ATF3        | 5'-CTC CTG GGT CAC TGG<br>TGT TT-3' and 5'-AGG CAC TCC<br>GTC TTC TCC TT-3' | 5'-AGG CAC TCC GTC TTC<br>TCC TT-3'       |
| human ATF4        | 5'-GGG CTC ATA CAG ATG<br>CCA CT-3'                                         | 5'-CTG ACC ACG TG GAT GAC<br>AC-3'        |
| human GRP78       | 5'-TGC AGC AGG ACA TCA<br>AGT TC-3'                                         | 5'-CGC TGG TCA AAG TCT<br>TCT CC-3'       |
| human CHOP        | 5'-CTT GGC TGA CTG AGG<br>AGG AG-3'                                         | 5'-TCA CCA TTC GGT CAA<br>TCA GA-3'       |
| human Cavin1      | 5'-ACG AGC AAT ACG GTG<br>AGC AA-3'                                         | 5'-CCT CCG ACT CTT TCA<br>GCG AT-3'       |
| human GAPDH       | 5'-TCA ACG GAT TTG GTC GTA<br>TT-3'                                         | 5'-CTG TGG TCA TGA GTC<br>CTT CC-3'       |
