# Supplementary material for: Caveolar communication with xenobiotic-stalled ribosomes compromises gut barrier integrity
Source: PubMed Central journal article supplement (PMC7253476; doi:10.1038/s42003-020-0994-1), 2020-05-27
Supplement: 42003_2020_994_MOESM2_ESM.pdf [file 42003_2020_994_MOESM2_ESM.pdf]

## **Description of additional supplementary files**

### Supplementary Data 1

Excel file showing the source data behind the graphs
